# Supplementary material for: Sequential treatment of cyanide and phenolic mixtures using CMC-PVP-nZVI/Pd and Rhodococcus pyridinivorans strain PDB9T N1
Source: Royal Society of Chemistry journal article supplement (doi:10.1039/d5na00920k), 2025-12-19
Supplement: d5na00920k1.pdf [file d5na00920k1.pdf]

## **Treatment of cyanide and phenolic mixture using sequential CMC-PVP-Pd-nZVI / *Rhodococcus pyridinivorans* strain PDB9T N1 nano biohybrid system**

**Ankita Priyadarshini<sup>a</sup>, Naresh Kumar Sahoo<sup>a\*</sup> , Soumya Mishra<sup>a</sup>, Prasant Kumar Sahoo<sup>b</sup>, Ranjan Kumar Bhuyan<sup>c</sup>, Prangya Ranjan Rout<sup>d</sup>, Bankim Chandra Tripathy<sup>e</sup>**

*<sup>a</sup>Department of Chemistry, Environmental Science and Technology Program, Faculty of Engineering and Technology (ITER), Siksha 'O' Anusandhan (Deemed to be University), Bhubaneswar 751030, Odisha, India*

*<sup>b</sup>Environmental Hydrology Division, National Institute of Hydrology, Jalvigyan Bhawan, Roorkee 247667, India*

*<sup>c</sup>P.G. Department of Physics, Government Autonomous College Angul Odisha, India.*

*<sup>d</sup>Department of BioTechnology. Dr B R Ambedkar National Institute of Technology Jalandhar, India*

*<sup>e</sup>Faculty of Chemical Sciences (AcSIR), Department of Hydro and Electrometallurgy, Institute of Minerals and Materials Technology, Bhubaneswar 751 013, India*

### ***Supplementary Materials***

---

\* Corresponding Author.

<sup>a</sup>Department of Chemistry, Environmental Science Program, Faculty of Engineering and Technology (ITER), Siksha 'O' Anusandhan (Deemed to be University), Bhubaneswar 751 030, Odisha, India. Email address :nareshsahoo@soa.ac.in [/nareshks2010@gmail.com](mailto:nareshks2010@gmail.com) (Naresh K. Sahoo)

## 2. Results and Discussion

### 3.1. Characterization

#### 3.1.1. XRD Analysis

Fig. 1 (S) given in the supplementary material shows the XRD spectrum of the *CMC-PVP-nZVI/Pd* nanocomposite. The use of CMC and PVP in the nanocomposite disrupted the normal arrangement of iron atoms, causing XRD to scatter in different directions. This led to a significant decrease in the distinct peak of nZVI, indicating the amorphous nature of the CMC-PVP-nZVI/Pd nanocomposite.

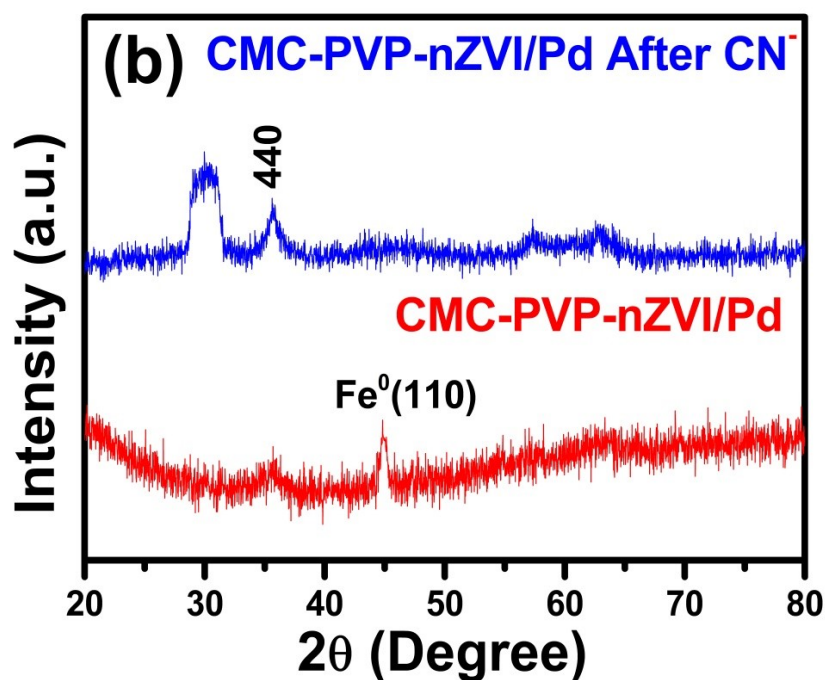

**Fig. 1. ( S)** XRD characterization of CMC-PVP-nZVI/Pd nanocomposite before and after cyanide uptake.

The XRD patterns of Pd in CMC-PVP-NZVI/Pd were not detectable, likely due to the low Pd content and the well-dispersed nature of Pd within the PVP-NZVI/Pd framework. At 34.9°, a small peak was observed, corresponding to mild oxidation of outer layer nZVI.<sup>28,34</sup> These

findings align well with the previous reported literature.<sup>34,36</sup> After cyanide uptake an extra peak was observed in the CMPVP-nZVI/Pd composite (Fig. 1S), corresponding to iron cyanide  $[\text{Fe}_4(\text{Fe}(\text{CN})_6)_3]$  at  $2\theta$  angle of  $35.41^\circ$  indexed to 440 plane<sup>12</sup>, which confirmed the reductive sorption of cyanide on the nZVI surface.
